# Supplementary material
Source: PubMed Central journal article supplement (PMC2861445)
Supplement: tpc.109.072272_1.pdf [file tpc.109.072272_1.pdf]

Supplemental Data. Bennett et al. (2010). Plant Cell 10.1105/tpc.109.07272.

```

BRN1 -----MSSSNGGVPPGFRFHPTDEELLHYYLKKKKISYEKFEVEVIKEVDLNKIEPWLQDRCKIGSTPQNEWYFFSHKDRKYPTGS 81
BRN2 -----MGSSSNGGVPPGFRFHPTDEELLHYYLKKKKISYQKFEVEVIREVDLNKLEPWLQERCKIGSTPQNEWYFFSHKDRKYPTGS 82
SMB MEIGSSSTVAGGGQLSVPPGFRFHPTDEELLHYYLKKKKVSIEYEPIDLDVIREVDLNKLEPWLQERCKIGSGPQNEWYFFSHKDKKYPTGT 90
NST1 -MMSKSMISVNGQSQVPPGFRFHPTDEELLQYYLRKKVNSIEIDLVDVIRDVDLNKLEPWLQEMCKIGTTPQNDWYFFSHKDKKYPTGT 89
NST2 -----MNISVNGQSQVPPGFRFHPTDEELLKYYLRKKKISNIKIDLDVIRIDLNKLEPWLQEMCKIGTTPQNDWYFFSHKDKKYPTGT 84
NST3 -MADNKVNLSINGQSKVPPGFRFHPTDEELLHYYLKKKVNSQKIDLDVIREVDLNKLEPWLQEECRIGSTPQNDWYFFSHKDKKYPTGT 89
VND1 -----MEPMESCSVPPGFRFHPTDEELVGYLRRKKIASQKIDLDVIRIDLYRIEPWDLQEQCRIGYEEQNEWYFFSHKDKKYPTGT 82
VND2 -----MESVDQSCSVPPGFRFHPTDEELVGYLRRKKVASQKIDLDVIRIDLYRIEPWDLQESCRIGYEEERNEWYFFSHKDKKYPTGT 83
VND3 -----MMKVDQDYSCSIPPPGFRFHPTDEELVGYLRRKKVASQRIDLDVIREIDLYKIEPWLQERCKIGYEEQTEWYFFSHRDKKYPTGT 85
VND4 -----MNSFSHVPPGFRFHPTDEELVDYYLRKKVASKRIEIDFIKIDLYKIEPWLQELCKIGHEEQSDWYFFSHKDKKYPTGT 80
VND5 -----MNSFSQVPPGFRFHPTDEELVDYYLRKKVASKRIEIDIKDVLDLYKIEPWLQELCKIGNEEQSEWYFFSHKDKKYPTGT 80
VND6 -----MESLAHIPPGYRFHPTDEELVDYYLRKKVAFPMQVDVIKDVLDLYKIEPWLQELCGRGTGEEREWYFFSHKDKKYPTGT 80
VND7 -----MDNIMQSSMPPGFRFHPTDEELVGYLDRKINSMSKALDVIVEIDLYKMEPWLQARCKLGYEEQNEWYFFSHKDRKYPTGT 82

BRN1 RTNRATHSGFWKATGRDKCIRN-SYKKIGMRKTLVIFYKGRAPHGQKTDWIMHEYR-IEDTEDD-----PCEDGWVVCRV 153
BRN2 RTNRATHAGFWKATGRDKCIRN-SYKKIGMRKTLVIFYKGRAPHGQKTDWIMHEYR-LEDADDPQA-----NPSEDGWVVCRV 157
SMB RTNRATAAGFWKATGRDKSIHLNSSKKIGLRKTLVIFYTGRAPHGQKTEWIMHEYR-LDDSENE-----IQEDGWVVCRV 163
NST1 RTNRATAAGFWKATGRDKIIYS-NGRRIIGMRKTLVIFYKGRAPHGQKSDWIMHEYR-LDDNIIISPEDVTVHEVVSIIIGEASQDEGWVVCRI 177
NST2 RTNRATTVGFWKATGRDKTIYT-NGDRIIGMRKTLVIFYKGRAPHGQKSDWIMHEYR-LDESVLISSCGDHDVNVETCDVIGSDEGWVVCRV 172
NST3 RTNRATVAGFWKATGRDKIICS-CVRRIGLRKTLVIFYKGRAPHGQKSDWIMHEYR-LDDTPMSNGYADVVTEDPM---SYNEEGWVVCRV 174
VND1 RTNRATMAGFWKATGRDKAVYD-KTKLIGMRKTLVIFYKGRAPNGKKSQSDWIMHEYR-LES DENA-----PPQEEGWVVCRA 155
VND2 RTNRATMAGFWKATGRDKAVYD-KSKLIGMRKTLVIFYKGRAPNGQKTDWIMHEYR-LES DENA-----PPQEEGWVVCRA 156
VND3 RTNRATVAGFWKATGRDKAVYL-NSKLIIGMRKTLVIFYRGRAPNGQKSDWIIHEYYSLESHQNS-----PPQEEGWVVCRA 159
VND4 RTNRATKAGFWKATGRDKAIYL-RHSLIGMRKTLVIFYKGRAPNGQKSDWIMHEYR-LETDENGL-----TPQEEGWVVCRV 153
VND5 RTNRATKAGFWKATGRDKAIYI-RHSLIGMRKTLVIFYKGRAPNGQKSDWIMHEYR-LETSENG-----TPQEEGWVVCRV 153
VND6 RTNRATGSGFWKATGRDKAIYS-QELVIGMRKTLVIFYKGRAPNGQKSDWIMHEYR-LETDENGL-----PPHEEGWVVCRA 153
VND7 RTNRATAAGFWKATGRDKAVLS-KNSVIGMRKTLVYYYKGRAPNGRKSQSDWIMHEYR-LQNSELA-----PVQEEGWVVCRA 155

BRN1 FKKKKNLFKVGNVDVG-----SNIS-----NNRL----- 175
BRN2 FMKKKNLFKVVNEGS-----SSINSLDQHNHD-----ASNHHAL----- 191
SMB FKKKKNHFRGFHQEQ-----EQDHHHHQYISTNNDDHDDHH-----HIDSNSNNHSPLILHPL 215
NST1 FKKKKNLHKTLSNPVG-----GASLSGGGDTPKTTSS-----QIFNEDTLDQF 219
NST2 FKKKNNLCKNMIS-----SSPASSVKTPS-----FNEETIEQL 204
NST3 FRKKKNYQKIDDCP-----KITLSSLPDDTEEEKGP-----TFHNTQNVDTGLDHV 218
VND1 FKKR-ATGQA-KNTETWSSS-----YFYDEVAP-----NGVNSVMDPIDYISKQOHNI-----FGKGLMCKQEQLEG 214
VND2 FKKKPMGTQA-KNTETWSSS-----YFYDELP-----SGVRSVTEPLNYVSKQKQNV-----FAQDLMFKQEQLEG 215
VND3 FKKRRTTIPTK--RRQLWDPN-----CLFYDDAT----LLEPLDKRARHNPDTATPFKQ-----ELLSEASHVQDGD 220
VND4 FKKRLAAV----RRMGDYSSPS-H-WYDDQLS----FMASELETNGQRRILPNHHQQQQHEHQHMPYGLNASAYALNNPNLQCKQE 231
VND5 FKKKLAAT----VRKMGDYHSSPSQH-WYDDQLS----FMASEIISSPRQFLPNHHYN-RHHHQQTLPCLGN--AFNNNNPNLQCKQE 230
VND6 FKKKLTMMYNNPRTMMGSSSQESN-WFTQQMDVGN-----YSSVTMNTSHH-----IGASSSSHNLNQM 190
VND7 FRKPIPNQRPLGYEPWQNQL-----YHVESSNN-----YSSVTMNTSHH-----IGASSSSHNLNQM 208

```

Supplemental Data. Bennett et al. (2010). Plant Cell 1 10.1105/tpc.109.072272.

|      |                                                                                       |     |
|------|---------------------------------------------------------------------------------------|-----|
| BRN1 | -----EARSFIRRESPTYQGISMFELNKPEEISVHQYPPMPFQPHHKPLSIGYDYSLALL-----                     | 230 |
| BRN2 | -----QARSMHRDSPYQLVRNHGAMTFELNKPDALHQPPIFHKPPSLGFDYSSGLA-----                         | 245 |
| SMB  | DHHHHHHHIG-----RQIHMLPHEFANTLSHGSMHLPQLFSPDSAAA---AAAAAASAQPF-----                    | 268 |
| NST1 | LELMGRS-CKEEL-----NLD-----PFMKLPNLESPNSQAINN-----                                     | 252 |
| NST2 | LEVMGQS-CKGEI-----VLD-----PFLKLPNLECHNNTTITS-----                                     | 237 |
| NST3 | LLYMDRTGSNICMPESQ-----TTTQHQDDVLFMQLPSLETPKSESPVD-----                                | 262 |
| VND1 | MVDGINYIQS-N-----QFIQLPQLQSPSLPLM-----                                                | 241 |
| VND2 | SDIGLNF IHC-D-----QFIQLPQLESPLPLT-----                                                | 242 |
| VND3 | FGSMYLCIDDD-----QFSQLPQLESPLPSE-----                                                  | 248 |
| VND4 | LELHYNHLVQR---NHLLDESH-----LSFLQLPQLESFKIQODNS---NCNSLPYGT-SNIDNNSSHN                 | 288 |
| VND5 | LELHYNQMVQHQQQNHHLRES-----MFLQLPQLESPTSNCN-----SDNNNTRNI                              | 277 |
| VND6 | -----NYYHLPDLESPRMFQSSSSSSLSLHQNDQDPYGVVLSTIN                                         | 231 |
| VND7 | LMSNNHYNPNN-----TSSSMHQYGNIELPQLDSPSLSPSL-----                                        | 244 |
| BRN1 | -----PRESEYQQACQPSGVEVGTCKA-----VSEWIGIVNCNMVSHEDSS--RAMRFED-----                     | 277 |
| BRN2 | -----RDSESAASEGLQYQQACEPGLDVGTCET---VASHN---HQQG-LGEWAMMDRLVTCHMGNEDESS--RGITYED--    | 310 |
| SMB  | -VSPINTTDIECSQN-LLRLTS-----NNN-----Y---GGDWSFLDKLLTTGNMNQQQQQQVQNHQAKCF               | 324 |
| NST1 | ---CHVSSPDTNHNHIVSNVVDT-----SFVTSWAALDRLVASQLNGPTSYSITAVNESHVG                        | 306 |
| NST2 | ---YQWLIDDQVNNCHVSKVMDP-----SFITSWAALDRLVASQLNGPNSYSIPAVNETSQ-                        | 290 |
| NST3 | ---QSFLTPSKLDFSPVQEKITE-----RPVCSNWAASLDRLVAWQLNNGHHNPCHRKSFDEE-                      | 316 |
| VND1 | -KRPSSSMSITSMNNYN-YKLPLADEE-----SFESFIR-GEDRRKKKKQVMVTGNWRELDKFVASQLMSQEDNGTSSF-----  | 313 |
| VND2 | -KRPVSLTSITSLEKNKNIYKRHLIEEDV-----SFNALISSGNKDKKKKKTVMTTDWRALDKFVASQLMSQED-GVSGF----- | 316 |
| VND3 | -ITPHSTTFSENSSRKDD-----MSSEKRITDWRVLDKFVASQFLMS-----                                  | 289 |
| VND4 | ANLQQS-NIAHEEQ- --NQGNQNF- --SLY--MNSGNEQVMDQVTDWRVLDKFVASQLSNE-----                  | 342 |
| VND5 | SNLQKSSNISHEEQ- --QQGNQSF- --SLY--YDQGVQM---TTDWRVLDKFVASQLSND-----                   | 329 |
| VND6 | ATPTTIMQRDDGHVITNDDDHMIMMNTSTGD-----HHQSGLLVNDHDNDQVMDWQTLDKFVASQLIMSQ-----           | 296 |
| VND7 | -----GTNK-----DQNESFEQE-EKSFNCVDWRTLDTLLETQVIHP-----                                  | 281 |
| BRN1 | -----DGNNTSSTVQ-----PPSNL-----LSLRGEN-GFLGLF-----                                     | 305 |
| BRN2 | -----GNNNSSSVVQ---PVPATNQ-----LTLRSEM-DFWGYSK-----                                    | 341 |
| SMB  | GDLS-----NNDNNDQ-----ADHLGNNN--GGSSSPVNQRFP-FHYLGND-LLKFKP-----                       | 371 |
| NST1 | -----HDHLALPSVRSPYPSLNRAS-----YHAGLTQEY-TPEMELWNTTSSLSSS-----PGPFCHVSNVSG             | 365 |
| NST2 | -----SPYHGLNRSG-----CNTGLTPDYIPEIDLWNEADFARTT-----CHLLNGSG                            | 334 |
| NST3 | -----EENGDTMMQRWD-----LHWNNDDNVDLWSSFTSSSS-----LDPLLHLSV---                           | 358 |
| VND1 | ----AGHH-----IVNEDKNNN--DVEMDSSMFL-SEREEENRFVSEFLST-----NSDYDIGICVFDN-----            | 365 |
| VND2 | ----GGHHEEDNNKIGHYNNEESNNKG-SVETASSTLL-SDREEENRFISGLLCS-----NLDYDLYRDLHV-----         | 377 |
| VND3 | -----GED-----                                                                         | 292 |
| VND4 | -----E---AATASASIQNNAK-DTSNAEYQVDEE-----KDPKRASDMGEEYT---ASTSSSCQIDLWK-----           | 395 |
| VND5 | -----EEAAAVVSSSSHQNNVKIDTRNTGYHVIDEGINLPENDSERVVEMGEEYSNAHAASTSSSCQIDL-----           | 394 |
| VND6 | -----EEEEVNKDPDSSNETFHHL-EEQAATMVSMNAS-----SSSSPCSFYSWAQNTHT-----                     | 348 |
| VND7 | -----HNPNIILMFETQSYNPA-----PSFSPMHQSYNEVEANIHHSLGCFPDS-----                           | 324 |

Supplemental Figure 1 - Multiple sequence alignment of Class IIB NAC family. Fully conserved amino acids are indicated with black areas.

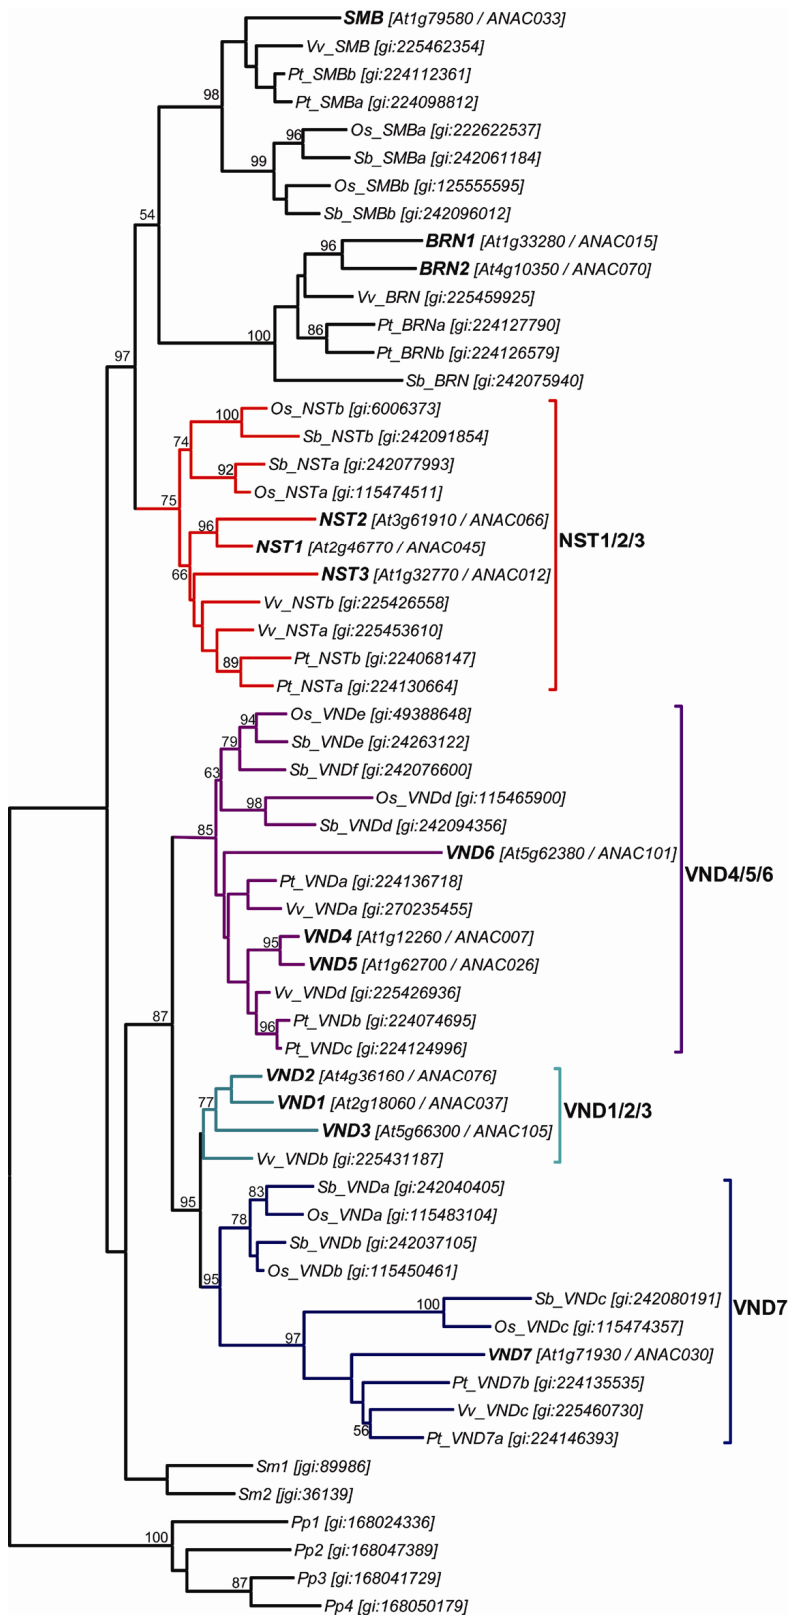

**Supplemental Figure 2 - Extended phylogenetic tree of the SMB/NST/VND family**  
 Maximum likelihood phylogenetic tree inferred with RAXML and the WAG substitution model with gamma rate distribution. The numbers at the nodes indicate bootstrap support calculated by RAXML bootstrapping using 100 replicates. Only bootstrap values over 50% are indicated. We used the sequences from the moss *Physcomitrella patens* as an outgroup to root the tree.

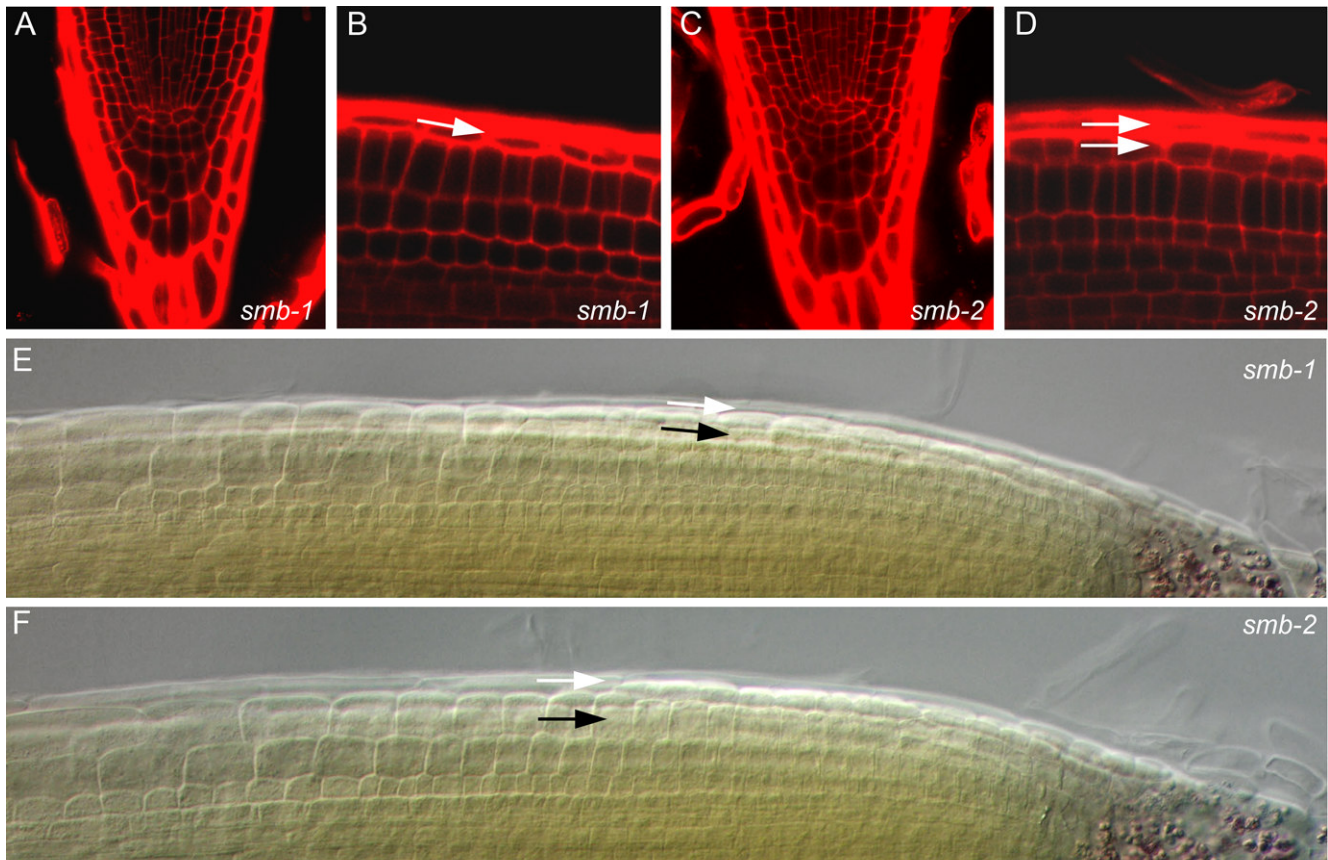

**Supplemental Figure 3 - Root cap phenotypes in *smb* alleles**

(A) Columella structure in *smb-1*

(B) LRC structure in the meristem zone of *smb-1*. White arrows indicates single LRC layer.

(C) Columella structure in *smb-2*

(D) LRC structure in the meristem zone of *smb-2*. White arrows indicate double LRC layer.

(E-F) Root meristem structure in *smb-1* and *smb-2*. White arrows indicate outer LRC layers, black arrows indicate epidermal layer.

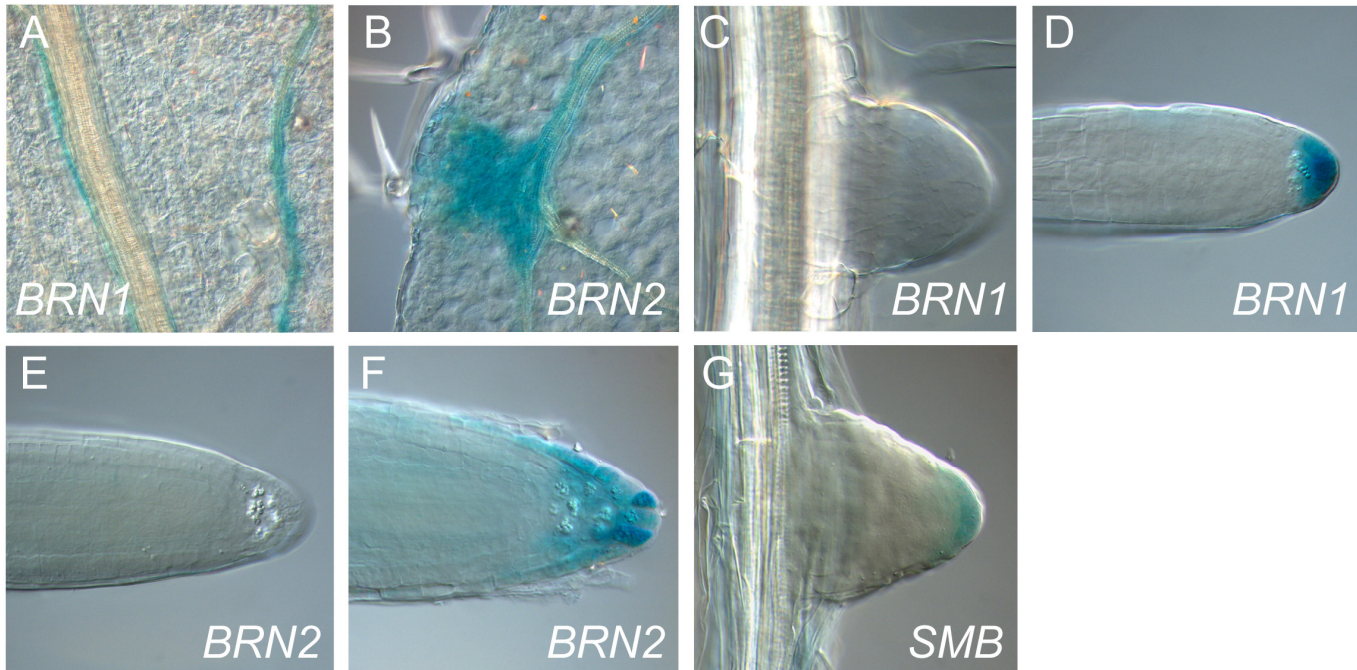

**Supplemental Figure 4** - SMB, BRN1 and BRN2 expression in vasculature and lateral roots.  
(A) Staining for  $\beta$ -Glucuronidase activity in *BRN1<sub>pro</sub>:GUS* in secondary vasculature in the first true leaf.  
(B) Staining for  $\beta$ -Glucuronidase activity in *BRN2<sub>pro</sub>:GUS* in hydathodes of the first true leaf.  
(C-D) Staining for  $\beta$ -Glucuronidase activity in *BRN1<sub>pro</sub>:GUS* in lateral roots.  
(E-F) Staining for  $\beta$ -Glucuronidase activity in *BRN2<sub>pro</sub>:GUS* in lateral roots.  
(G) Staining for  $\beta$ -Glucuronidase activity in *SMB<sub>pro</sub>:GUS* in lateral roots.



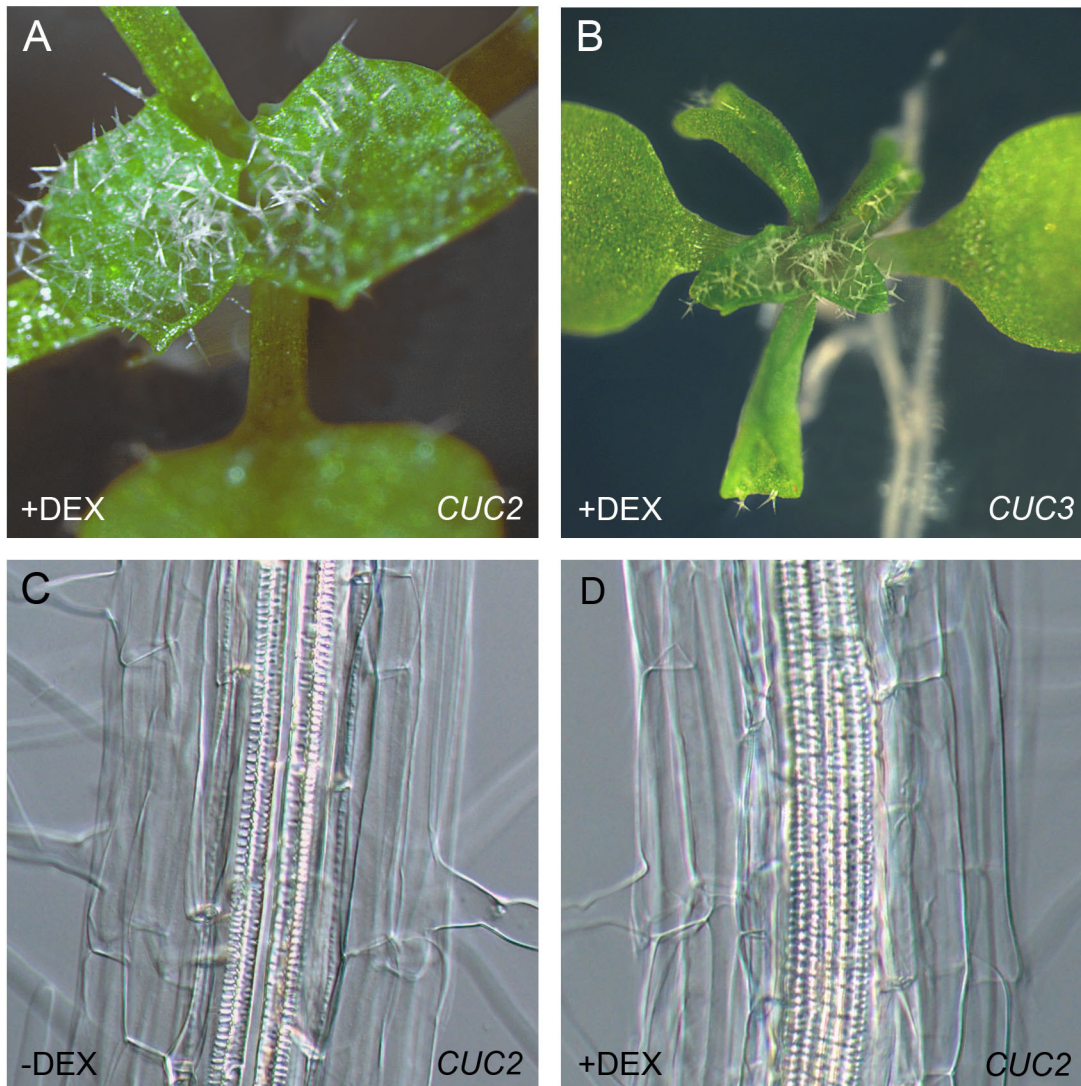

**Supplemental Figure 5** - Overexpression phenotypes of *CUC2* and *CUC3*

(A) Shoot phenotype of *35S:CUC2-GR* treated with DEX.

(B) Shoot phenotype of *35S:CUC3-GR* treated with DEX.

(C-D) Phenotypes of *35S:CUC2-GR* in the DZ of the root, treated with or without DEX, as indicated.

**Supplemental Table 1** - Sequences of oligonucleotide primers used in this study.

| Primer Name | Purpose                                 | Sequence 5'-3'                      |
|-------------|-----------------------------------------|-------------------------------------|
| BRN1-SK-L   | Genotyping <i>ber1-1</i> insertion      | AAA TAT CCG ACA GGG TCA AGG         |
| BRN1-SK-R   |                                         | AAA CTC CGG CCA TAG TTT CAC         |
| BRN2-SK-L   | Genotyping <i>ber2-1</i> insertion      | CAC TAG GGT TGG CTT GAG GAT         |
| BRN2-SK-R   |                                         | TAG TTG GAG ACA AGA GAA GGA A       |
| LBb1.3      | Genotyping SALK insertions              | ATT TTG CCG ATT TCG GAA C           |
| pSMB-F      | Cloning SMB promoter                    | GAG GCC ATT GAC CTG AAA             |
| pSMB-R      |                                         | TAT CCT TAC TCT TCT TTA AGC         |
| pBRN1-F     | Cloning BER1 promoter                   | GGT CAA TTC TGG TTT CCG TTA GA      |
| pBRN1-R     |                                         | TGT TCG GTT AAT AAA TGA TCA         |
| pBRN2-F     | Cloning BER2 promoter                   | TTA GTA TAT GAC AAT ATG TGC TCA     |
| pBRN2-R     |                                         | TTC GAT TTA CGT TTT CCT TCT CT      |
| pCEL5-F     | Cloning CEL5 promoter                   | GT TCC AGA AAA GAA TCA TTG AT       |
| pCEL5-R     |                                         | TCT TGT TAT TGT GTT GGC TTG AGG GTA |
| cSMB-F      | Cloning SMB cDNA                        | ATG GAG ATA GGG TCG TCA T           |
| cSMB-R      |                                         | CTT TGG GAA CTT GAG AAG AT          |
| cBRN1-F     | Cloning BER1 cDNA & expression analysis | ATG AGT TCG TCT AAC GGA GGT GT      |
| cBRN1-R     |                                         | AAA CAA CCC AAG AAA TCC ATT TTC A   |
| cBRN2-F     | Cloning BER2 cDNA & expression analysis | ATG GGT TCT TCG TCG AAC GGA         |
| cBRN2-R     |                                         | ATC CAT CTC ACT ACG CAA TGT T       |
| cNST1-F     | Cloning NST1 cDNA                       | ATG ATG TCA AAA TCT ATG AGC ATA     |
| cNST1-R     |                                         | TCC ACT ACC ATT CGA CAC GTG ACA AA  |
| cVND6-F     | Cloning VND6 cDNA                       | ATG GAA AGT CTC GCA CAC ATT         |
| cVND6-R     |                                         | CGT GTG TGT ATT TTG AGC CCA         |
| cVND7-F     | Cloning VND7 cDNA                       | ATG GAT AAT ATA ATG CAA TCG TCA AT  |
| cVND7-R     |                                         | CGA GTC AGG GAA GCA TCC AAG AGA AT  |
| cCUC2-F     | Cloning CUC2 cDNA                       | ATG GAC ATT CCG TAT TAC CA          |
| cCUC2-R     |                                         | GTA GTT CCA AAT ACA GTC AA          |
| cCUC3-F     | Cloning CUC3 cDNA                       | ATG ATG CTT GCG GTG GAA GAT         |
| cCUC3-R     |                                         | CAG CTG GAA TCC TAA AGG ACA T       |
| CESA8-RT-F  | Analysing expression of CESA8           | GTG TAG TTT CCC GAT CTG CAA         |
| CESA8-RT-R  |                                         | GAG CCA AGA TGA TCA ACC GCA T       |
| IRX9-RT-F   | Analysing expression of IRX9            | TGA GGC ACA TTG AAC ATC ACA A       |
| IRX9-RT-R   |                                         | ATC TTG TGC CGG AAG TCC CTT         |
| 4CL1-RT-F   | Analysing expression of 4CL1            | GAA TCC GTG CCA ATC CCT GAA         |
| 4CL1-RT-R   |                                         | CTG CTT CCG TCA TTC CGT AT          |
| XCPI-RT-F   | Analysing expression of XCPI            | CGA GTT TGC GGA TTT GAC CCA T       |
| XCPI-RT-R   |                                         | AGT CTC TTC CTG AAG CCT CAA         |
| SND2-RT-F   | Analysing expression of SND2            | CCG ACG GAT CAA GAG GTC TT          |
| SND2-RT-R   |                                         | TGG CCG TGT TTT TCC TGT CTT         |
| SND3-RT-F   | Analysing expression of SND3            | CCT TAT GCA TTT GGA GGC GAA         |
| SND3-RT-R   |                                         | CCA CCA TGC TCA TAC CCG AA          |

Supplemental Data. Bennett et al. (2010). *Plant Cell* 10.1105/tpc.109.072272.

|           |                                   |                                |
|-----------|-----------------------------------|--------------------------------|
| CEL3-RT-F | Analysing expression<br>of CEL3   | ACT GCT CCT ACT CTG GTT ACA A  |
| CEL3-RT-R |                                   | GGC GTA AGT TGT GAG CAA GAA    |
| CEL5-RT-F | Analysing expression<br>of CEL5   | CAA TAC CGA GGC GCT TAC AGT A  |
| CEL5-RT-R |                                   | TTT GGC GTA GGT GGT GAG CAA    |
| QUA1-RT-F | Analysing expression<br>of QUA1   | GCA GAA TCA CAC TCA CAG CTT    |
| QUA1-RT-R |                                   | CTC TTT AGC TTC AGC AAT CAC TT |
| ACT-RT-F  | Analysing expression<br>of ACTIN1 | ATG GCT GAT GGT GAA GAC AT     |
| ACT-RT-R  |                                   | TGG AAG TGC ATA CCC CTC AT     |
